# Supplementary material
Source: PubMed Central journal article supplement (PMC7649049)
Supplement: NIHMS1637070-supplement-1.pdf [file NIHMS1637070-supplement-1.pdf]

# **Histopathology of Stenosis Associated with Small Bowel Crohn's Disease: A Systematic Review**

## **SUPPLEMENT**

### **METHODS**

The following syntax was applied for the literature search:

EMBASE (Ovid, 1947-date of search)

1. Crohns disease.mp.
2. Small bowel.mp.
3. dilation.mp.
4. fibrosis.mp.
5. (histology and inflammation).mp.
6. (histology and fibrosis).mp.
7. stricture.mp.
8. OR/3-7
9. 1 AND 2 AND 8

MEDLINE (OVID, 1946-date of search)

Search ((((((dilation) OR (fibrosis) OR ("histology" AND "inflammation") OR ("histology" AND "fibrosis") OR (stricture)))))) AND Small bowel) AND Crohn's disease

**Supplementary Figure 1: PRISMA Flow Diagram**

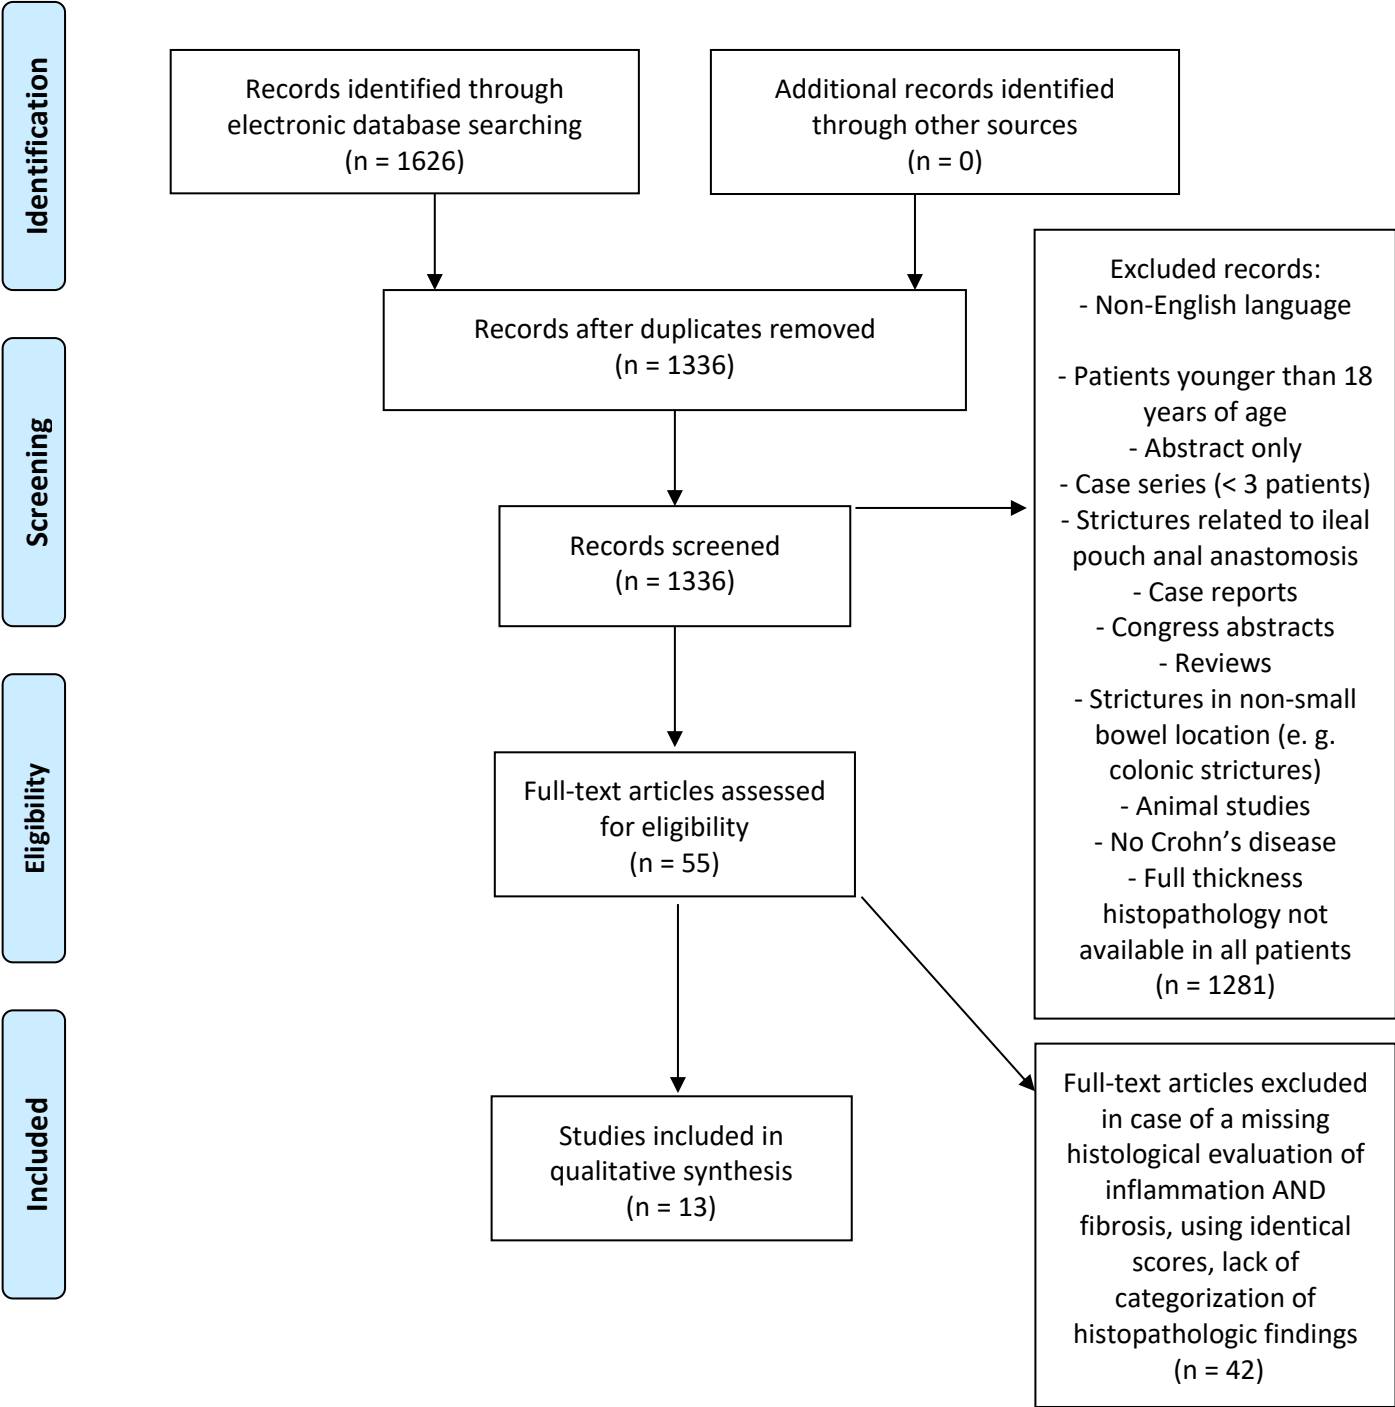

**Supplemental Table 1: Overall Score Characteristics**

| Author, year     | Focused exclusively on strictured area | Not focused exclusively on strictured area | Assessed stricture and adjacent bowel* in same specimen |    |                                        |         |
|------------------|----------------------------------------|--------------------------------------------|---------------------------------------------------------|----|----------------------------------------|---------|
|                  |                                        |                                            | Yes                                                     | No | Probably yes but not explicitly stated | Unknown |
| Kotanagi, 1991   |                                        | x                                          |                                                         |    | x                                      |         |
| Smedh, 1995      |                                        | x                                          | x                                                       |    |                                        |         |
| Pucilowska, 2000 | x                                      |                                            |                                                         |    | x                                      |         |
| Maconi, 2003     | x                                      |                                            |                                                         |    | x                                      |         |
| Chiorean, 2007   |                                        | x                                          |                                                         |    | x                                      |         |
| Jacene, 2009     |                                        | x                                          |                                                         | x  |                                        |         |
| Zappa, 2011      |                                        | x                                          |                                                         |    | x                                      |         |
| Girlich, 2011    |                                        | x                                          |                                                         |    |                                        | x       |
| Adler, 2012      | x                                      |                                            |                                                         | x  |                                        |         |
| Dillman, 2014    | x                                      |                                            |                                                         | x  |                                        |         |
| Pellino, 2016    |                                        | x                                          |                                                         |    |                                        | x       |
| Chen, 2017       | x                                      |                                            | x                                                       |    |                                        |         |
| Wagner, 2018     |                                        | x                                          |                                                         | x  |                                        |         |

\* Adjacent bowel indicates non-stricture area from the same surgical specimen.

**Supplemental Table 2: Inflammation Score General Characteristics**

| Author, year     | Type of INFLAMMATION scale (can be more than one for different items) |                 |                 |                 |  | Inflammatory scale includes degree of inflammation only | Inflammatory scale includes depth of inflammation only | Inflammatory scale includes both degree and depth of inflammation | If inflammatory scale includes both degree and depth of inflammation: |                                                      |                                                                                             |
|------------------|-----------------------------------------------------------------------|-----------------|-----------------|-----------------|--|---------------------------------------------------------|--------------------------------------------------------|-------------------------------------------------------------------|-----------------------------------------------------------------------|------------------------------------------------------|---------------------------------------------------------------------------------------------|
|                  | Dichotomic                                                            | Ordinal 3 grade | Ordinal 4 grade | Ordinal 5 grade |  |                                                         |                                                        |                                                                   | Depth separately scored from degree                                   | Depth included in the degree assessment as one score | Depth indicated only by including items such as transmural inflammation or fissuring ulcers |
| Kotanagi, 1991   |                                                                       |                 | X               |                 |  |                                                         |                                                        | X                                                                 |                                                                       |                                                      | X                                                                                           |
| Smedh, 1995      | X                                                                     |                 |                 |                 |  |                                                         |                                                        | X                                                                 | X                                                                     |                                                      |                                                                                             |
| Pucilowska, 2000 |                                                                       | X               |                 |                 |  | X                                                       |                                                        |                                                                   |                                                                       |                                                      |                                                                                             |
| Maconi, 2003     | X                                                                     |                 | X               |                 |  |                                                         |                                                        | X                                                                 |                                                                       |                                                      | X                                                                                           |
| Chiorean, 2007   |                                                                       | X               |                 |                 |  |                                                         |                                                        | X                                                                 |                                                                       | X                                                    |                                                                                             |
| Jacene, 2009     |                                                                       |                 | X               |                 |  | X                                                       |                                                        |                                                                   |                                                                       |                                                      |                                                                                             |
| Zappa, 2011      |                                                                       | X               |                 |                 |  |                                                         |                                                        | X                                                                 |                                                                       | X                                                    |                                                                                             |
| Girlich, 2011    | X                                                                     | X               |                 |                 |  |                                                         |                                                        | X                                                                 | X                                                                     |                                                      |                                                                                             |
| Adler, 2012      |                                                                       |                 |                 | X               |  |                                                         | X                                                      |                                                                   |                                                                       |                                                      |                                                                                             |
| Dillman, 2014    |                                                                       |                 |                 | X               |  |                                                         |                                                        | X                                                                 |                                                                       | X                                                    |                                                                                             |
| Pellino, 2016    |                                                                       | X               |                 |                 |  | X                                                       |                                                        |                                                                   |                                                                       |                                                      |                                                                                             |
| Chen, 2017       |                                                                       |                 | X               |                 |  |                                                         |                                                        | X                                                                 | X                                                                     |                                                      |                                                                                             |
| Wagner, 2018     | X                                                                     | X               |                 |                 |  |                                                         | X                                                      |                                                                   |                                                                       |                                                      |                                                                                             |

**Supplemental Table 2: Inflammation Score General Characteristics (cont.)**

| Author, year     | Inflammatory scale includes items other than inflammatory cells per se (e.g. crypt distortion, reactive change, edema) | Inflammatory scale only includes inflammatory cells |
|------------------|------------------------------------------------------------------------------------------------------------------------|-----------------------------------------------------|
| Kotanagi, 1991   | x                                                                                                                      |                                                     |
| Smedh, 1995      | x                                                                                                                      |                                                     |
| Pucilowska, 2000 | x                                                                                                                      |                                                     |
| Maconi, 2003     | x                                                                                                                      |                                                     |
| Chiorean, 2007   |                                                                                                                        | x                                                   |
| Jacene, 2009     |                                                                                                                        | x                                                   |
| Zappa, 2011      |                                                                                                                        | x                                                   |
| Girlich, 2011    | x                                                                                                                      |                                                     |
| Adler, 2012      |                                                                                                                        | x                                                   |
| Dillman, 2014    | x                                                                                                                      |                                                     |
| Pellino, 2016    |                                                                                                                        |                                                     |
| Chen, 2017       | x                                                                                                                      |                                                     |
| Wagner, 2018     | x                                                                                                                      |                                                     |

**Supplemental Table 3: Inflammation Score Detailed Characteristics**

| Author, year            | Inflammatory cell terms used |           |               |         |       |                |         |
|-------------------------|------------------------------|-----------|---------------|---------|-------|----------------|---------|
|                         | Neutrophil                   | Cryptitis | Crypt abscess | Erosion | Ulcer | Aphthous ulcer | Fissure |
| <b>Kotanagi, 1991</b>   | x                            | x         | x             | x       | x     |                | x       |
| <b>Smedh, 1995</b>      |                              |           |               |         | x     |                | x       |
| <b>Pucilowska, 2000</b> |                              |           |               |         |       |                |         |
| <b>Maconi, 2003</b>     | x                            |           | x             | x       | x     |                | x       |
| <b>Chiorean, 2007</b>   |                              | x         | x             |         | x     | x              | x       |
| <b>Jacene, 2009</b>     | x                            |           |               |         |       |                |         |
| <b>Zappa, 2011*</b>     | x                            |           |               |         |       |                |         |
| <b>Girlich, 2011</b>    | x                            |           | x             | x       |       |                |         |
| <b>Adler, 2012</b>      |                              |           |               |         |       |                |         |
| <b>Dillman, 2014</b>    |                              |           |               |         |       |                |         |
| <b>Pellino, 2016</b>    |                              |           |               |         |       |                |         |
| <b>Chen, 2017</b>       | x                            | x         | x             |         | x     |                | x       |
| <b>Wagner, 2018</b>     | x                            |           |               |         |       |                |         |

\*: categories exclude components of Chiorean scoring system



**Supplemental Table 4: Other Score Characteristics**

| Author, year            | Multiple item scales that also include inflammation and fibrosis | Scores limited exclusively to “inflammation” and “fibrosis” | Non-inflammatory cell / non-fibrosis / non-muscle/non-ECM items |                          |                                     |                                       |                    |                           |                                                                                      |
|-------------------------|------------------------------------------------------------------|-------------------------------------------------------------|-----------------------------------------------------------------|--------------------------|-------------------------------------|---------------------------------------|--------------------|---------------------------|--------------------------------------------------------------------------------------|
|                         |                                                                  |                                                             | Edema                                                           | Pyloric gland metaplasia | Shortening of villi/villous atrophy | Mucin depletion/ loss of goblet cells | Dilated lymphatics | Surface epithelial damage | Other                                                                                |
| <b>Kotanagi, 1991</b>   | X                                                                |                                                             | X                                                               | X                        | X                                   | X                                     |                    |                           |                                                                                      |
| <b>Smedh, 1995</b>      | X                                                                |                                                             | X                                                               | X                        | X                                   |                                       | X                  |                           |                                                                                      |
| <b>Pucilowska, 2000</b> | X                                                                |                                                             |                                                                 |                          |                                     |                                       |                    | X                         |                                                                                      |
| <b>Maconi, 2003</b>     | X                                                                |                                                             | X                                                               |                          |                                     |                                       |                    |                           |                                                                                      |
| <b>Chiorean, 2007</b>   |                                                                  | X                                                           |                                                                 |                          |                                     |                                       |                    |                           |                                                                                      |
| <b>Jacene, 2009</b>     | X                                                                |                                                             |                                                                 |                          |                                     |                                       |                    |                           |                                                                                      |
| <b>Zappa, 2011</b>      |                                                                  | X                                                           |                                                                 |                          |                                     |                                       |                    |                           |                                                                                      |
| <b>Girlich, 2011</b>    | X                                                                |                                                             | X                                                               |                          |                                     |                                       |                    |                           | pseudopolyps, regenerative epithelium, crypt architecture, crypt atrophy, hemorrhage |
| <b>Adler, 2012</b>      | X                                                                |                                                             |                                                                 |                          |                                     |                                       |                    |                           |                                                                                      |
| <b>Dillman, 2014</b>    |                                                                  | X                                                           |                                                                 |                          |                                     | X                                     |                    |                           | increased vascular density                                                           |
| <b>Pellino, 2016</b>    |                                                                  | X                                                           |                                                                 |                          |                                     |                                       |                    |                           |                                                                                      |
| <b>Chen, 2017</b>       | X                                                                |                                                             |                                                                 |                          |                                     |                                       |                    |                           | crypt architectural alteration, space volume expansion                               |
| <b>Wagner, 2018</b>     | X                                                                |                                                             |                                                                 |                          |                                     |                                       |                    |                           |                                                                                      |

**Abbreviation:** ECM: extracellular matrix



**Supplemental Table 5: Fibrosis Score General Characteristics**

| Author, year     | Fibrosis scoring system (can be more than one) |                 |                 |                 |       | Fibrosis score uses H&E only | Fibrosis score uses other stains | Fibrosis Assessment (only for "fibrosis", regardless of whether a degree scale was applied) |                               |
|------------------|------------------------------------------------|-----------------|-----------------|-----------------|-------|------------------------------|----------------------------------|---------------------------------------------------------------------------------------------|-------------------------------|
|                  | Dichotomic                                     | Ordinal 3 grade | Ordinal 4 grade | Ordinal 5 grade | Other |                              |                                  | Global score (layer not specified)                                                          | Specifies bowel wall layer(s) |
| Kotanagi, 1991   |                                                | X               |                 |                 |       | X                            |                                  |                                                                                             | X                             |
| Smedh, 1995      | X                                              |                 |                 |                 | X     | X                            |                                  |                                                                                             | X                             |
| Pucilowska, 2000 |                                                | X               |                 |                 |       |                              | X                                |                                                                                             | X                             |
| Maconi, 2003     |                                                |                 | X               |                 |       | X                            |                                  |                                                                                             | X                             |
| Chiorean, 2007   |                                                | X               |                 |                 |       | X*                           |                                  |                                                                                             | X                             |
| Jacene, 2009     |                                                |                 |                 |                 | X     |                              | X                                |                                                                                             | X                             |
| Zappa, 2011      |                                                | X               |                 |                 |       | X                            |                                  |                                                                                             | X                             |
| Girlich, 2011    | X                                              |                 |                 |                 |       | X*                           |                                  | X                                                                                           |                               |
| Adler, 2012      | X                                              |                 |                 | X               |       | X                            |                                  |                                                                                             | X                             |
| Dillman, 2014    |                                                |                 | X               |                 |       |                              | X                                |                                                                                             | X                             |
| Pellino, 2016    |                                                | X               |                 |                 |       | X*                           |                                  | X                                                                                           |                               |
| Chen, 2017       |                                                |                 | X               |                 |       |                              | X                                | X                                                                                           | X                             |
| Wagner, 2018     |                                                |                 |                 |                 | X     |                              | X                                |                                                                                             | X                             |

\*Inferred

**Supplemental Table 6: Fibrosis Score Detailed Characteristics**

| Author, year     | Fibrosis score includes muscle hyperplasia/hypertrophy element | Fibrosis score only includes fibrosis | Specific fibrosis items           |                   |           |                    |           |                          |              |
|------------------|----------------------------------------------------------------|---------------------------------------|-----------------------------------|-------------------|-----------|--------------------|-----------|--------------------------|--------------|
|                  |                                                                |                                       | (Mentions fibrosis in this layer) |                   |           |                    |           |                          |              |
|                  |                                                                |                                       | Mucosa                            | Muscularis mucosa | Submucosa | Muscularis propria | Subserosa | Transmural fibrosis/scar | Fibrosis NOS |
| Kotanagi, 1991   |                                                                | X                                     |                                   | X                 | X         |                    |           |                          |              |
| Smedh, 1995      | X                                                              |                                       |                                   |                   | X         | X                  | X         |                          |              |
| Pucilowska, 2000 | X                                                              |                                       |                                   |                   |           |                    |           |                          | X            |
| Maconi, 2003     |                                                                | X                                     |                                   | X                 | X         |                    |           |                          |              |
| Chiorean, 2007   | X                                                              |                                       |                                   |                   | X         |                    |           | X                        |              |
| Jacene, 2009     | X*                                                             |                                       |                                   |                   |           | X                  |           |                          |              |
| Zappa, 2011      |                                                                | X                                     |                                   |                   | X         |                    |           | X                        |              |
| Girlich, 2011    |                                                                | X                                     |                                   |                   |           |                    |           |                          | X            |
| Adler, 2012      | X                                                              |                                       |                                   |                   | X         | X                  | X         | X                        |              |
| Dillman, 2014    |                                                                | X                                     | X                                 |                   | X         |                    |           | X                        |              |
| Pellino, 2016    |                                                                | X                                     |                                   |                   |           |                    |           |                          | X            |
| Chen, 2017       | X*#                                                            |                                       | X                                 |                   | X         | X                  | X         |                          | X            |
| Wagner, 2018     | X                                                              |                                       |                                   |                   |           |                    |           |                          | X            |

**Abbreviation:** NOS: Not otherwise specified

Note: Elements of muscle hypertrophy\* and of muscle hyperplasia# are evaluated separately from fibrosis.

**Supplemental Table 6: Fibrosis Score Detailed Characteristics (cont.)**

| Author, year     | Muscle items other than fibrosis |                              |                                     |                                     | Items other than fibrosis or muscle |                       |
|------------------|----------------------------------|------------------------------|-------------------------------------|-------------------------------------|-------------------------------------|-----------------------|
|                  | Muscularis mucosa thickened      | Muscularis propria thickened | Muscle hyperplasia (MM, MP, or NOS) | Muscle hypertrophy (MM, MP, or NOS) | Neuronal hyperplasia                | Other ECM alteration  |
| Kotanagi, 1991   |                                  |                              |                                     |                                     | x                                   |                       |
| Smedh, 1995      | x                                |                              |                                     |                                     |                                     |                       |
| Pucilowska, 2000 |                                  | x                            |                                     |                                     |                                     |                       |
| Maconi, 2003     |                                  |                              |                                     |                                     |                                     |                       |
| Chiorean, 2007   |                                  |                              | x (NOS)                             |                                     |                                     |                       |
| Jacene, 2009     |                                  | x                            |                                     |                                     |                                     |                       |
| Zappa, 2011      |                                  |                              |                                     |                                     |                                     |                       |
| Girlich, 2011    |                                  |                              |                                     |                                     |                                     |                       |
| Adler, 2012      |                                  | x                            |                                     |                                     |                                     |                       |
| Dillman, 2014    |                                  |                              |                                     |                                     |                                     |                       |
| Pellino, 2016    |                                  |                              |                                     |                                     |                                     |                       |
| Chen, 2017       |                                  |                              | x (MM)                              | x(MP)                               | x                                   | adipocyte hyperplasia |
| Wagner, 2018     |                                  |                              |                                     | x(NOS)                              |                                     |                       |

**Abbreviations:** MM: muscularis mucosa; MP: muscularis propria; NOS: not otherwise specified; ECM: extracellular matrix
